# Supplementary material for: Prognostic role of PD-L1 for HCC patients after potentially curative resection: a meta-analysis
Source: Cancer Cell Int. 2019 Jan 29;19:22. doi: 10.1186/s12935-019-0738-9 (PMC6352338; doi:10.1186/s12935-019-0738-9)
Supplement: Supplementary file 3 — Additional file 3: Table S3. Association of PD-L1 and clinicopathological features and tumour-infiltrating lymphocytes of the included studies. [file 12935_2019_738_MOESM3_ESM.xlsx]

## Sheet: Sheet1
Table S3 Association of PD-L1 and clinicopathological features and tumour infiltrating lymphocytes of include studies
Study	Age	Gender	Hepatitis history	AFP	Cirrhosis	Tumor size	Tumor encapsulation	Tumor multiplicity	Tumor differentiation	Vascular invasion	Tumor stage	CD8+ TIL	HBV load
Gao 2009	0.77	0.4	1	0.084	0.64	0.33	0.26	1	0.15	0.043	0.4	NR	NR
Wu 2009	NR	NR	NR	NR	NR	NR	NR	NR	NR	NR	NR	NR	NR
Umemoto 2015	0.8279	0.7259	>0.050	0.105	NR	0.4912	NR	0.8072	0.072	>0.050	0.8202	NR	NR
Kan 2015	0.622	1	0.004	0.948	NR	0.209	NR	NR	0.403	0.003	0.188	NR	NR
Calderaro 20161	0.12	0.102	>0.050	0.038	NR	0.067	NR	<0.001	<0.001	<0.001	NR	NR	NR
Chen 2016	NR	NR	NR	NR	NR	NR	NR	NR	NR	NR	NR	NR	NR
Gabrielson 2016	NR	NR	NR	NR	NR	NR	NR	NR	0.15	0.18	0.12	0.003	NR
Xie 2016	0.36	0.383	0.612	NR	NR	NR	NR	NR	0.767	NR	0.241	<0.001	NR
Chang 2017	0.726	0.666	NR	0.456	0.868	0.701	0.192	0.206	1	0.585	0.545	0.034	NR
Huang 2017	0.478	0.166	0.144	0.688	NR	0.019	0.001	0.216	0.921	0.332	0.373	<0.001	0.006
Jung 2017	0.658	0.058	0.572	0.325	0.344	0.041	NR	NR	0.129	>0.050	>0.050	NR	NR
Semaan 2017	0.15	0.56	>0.050	NR	0.01	NR	NR	0.61	0.005	0.14	0.036	<0.001	NR
Sideras 2017	NR	NR	>0.050	0.159	0.113	0.315	NR	0.446	0.429	0.122	NR	0.046	NR
Chang 2018	NR	NR	NR	NR	NR	NR	NR	NR	NR	NR	NR	NR	NR
Dai 2018 1	0.101	0.687	0.261	0.226	0.08	0.516	NR	0.785	0.241	0.115	NR	NR	NR
Dai 2018 2	0.67	0.012	0.77	0.049	0.759	NR	NR	NR	NR	0.004	0.822	NR	NR
Hu 2018	0.819	0.772	0.19	0.045	0.138	0.033	0.12	0.084	0.024	0.008	0.048	NR	NR
Liu 2018	0.356	0.499	0.33	0.864	NR	0.094	NR	0.364	0.325	0.088	0.084	<0.001	NR
Abbreviations: NR: not reported; TIL: tumor-infiltrating T lymphocytes. *Note: The number here refers to the P value of the calculated association of PD-L1 and clinicopathological feature reported in included studies.
